# Supplementary material
Source: PubMed Central journal article supplement (PMC2844150)

# Supplementary Figure S1

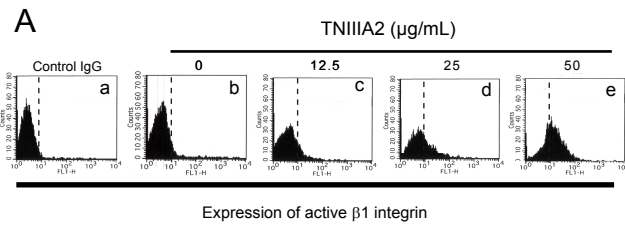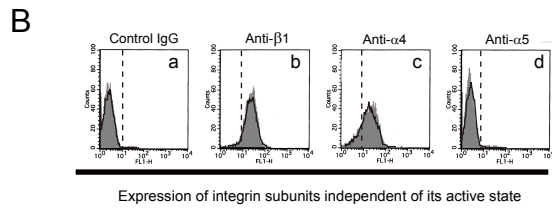

Supplement: supp_M109.027581_jbc.M109.027581-1.pdf [file supp_M109.027581_jbc.M109.027581-1.pdf]

# Supplementary Figure 2

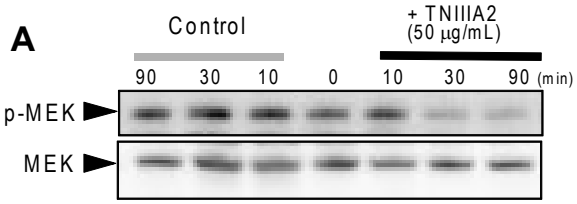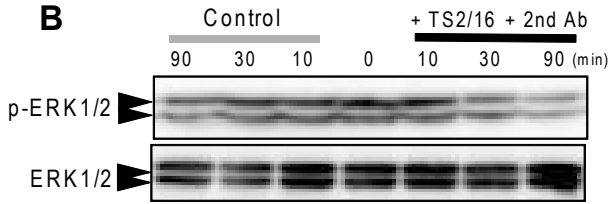

Supplement: supp_M109.027581_jbc.M109.027581-2.pdf [file supp_M109.027581_jbc.M109.027581-2.pdf]

# Supplementary Figure 3

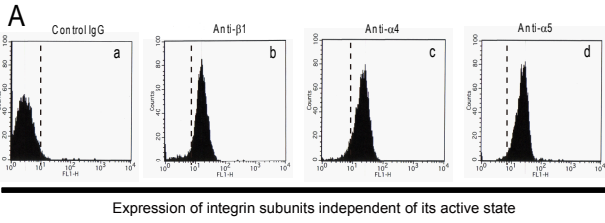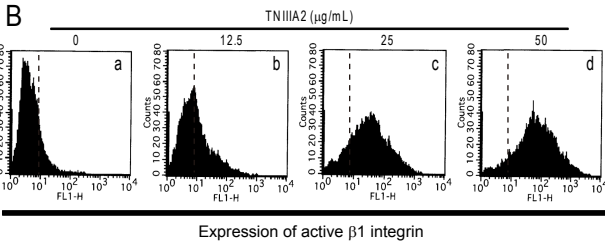

Supplement: supp_M109.027581_jbc.M109.027581-3.pdf [file supp_M109.027581_jbc.M109.027581-3.pdf]
